# Supplementary material for: Mutation in FBXO32 causes dilated cardiomyopathy through up-regulation of ER-stress mediated apoptosis
Source: PubMed Central journal article supplement (PMC8285540; doi:10.1038/s42003-021-02391-9), 2021-07-16
Supplement: 42003_2021_2391_MOESM3_ESM.pdf [file 42003_2021_2391_MOESM3_ESM.pdf]

## **Description of Additional Supplementary Files**

**File name:** Supplementary Data 1

**Description:** Gene Ontology (GO) enrichment analysis of biological processes associated with significantly dysregulated genes in FBXO32 mutant hearts.

**File name:** Supplementary Data 2

**Description:** List of dysregulated genes with roles in the ER stress response in FBXO32 mutant hearts.

**File name:** Supplementary Data 3

**Description:** List of CHOP target genes from the microarray data analysis in FBXO32 mutant hearts.

**File name:** Supplementary Data 4

**Description:** Network analysis of CHOP target genes in FBXO32 mutant hearts.

**File name:** Supplementary Data 5

**Description:** Source data for graphs
